# Supplementary material for: Effect of nanoemulsion loaded with macela (Achyrocline satureioides) on the ultrastructure of Staphylococcus aureus and the modulating activity of antibiotics
Source: Frontiers journal article supplement (doi:10.3389/fnano.2024.1466988), 2024-11-08
Supplement: Data_Sheet_1.PDF [file Data_Sheet_1.PDF]

## Supplementary Material

The development and physicochemical characterization of *Linum usitatissimum* oil nanoemulsion loaded with macela extract (*Achyrocline satureioides*) was carried out to optimize its efficacy and stability (Pinheiro Machado et al., 2020). Different formulations were prepared and tested to identify the most efficient composition in terms of physicochemical stability and antimicrobial activity. After analyzing the evaluated parameters, the formulation called NE-ML 1:5 showed the best performance and was selected for the investigation in this manuscript, which aims to help elucidate the mechanism of action of this formulation. The information on the characterization of this formulation is summarized in Supplementary Table 1, which describes the results obtained for each parameter analyzed and highlights the most relevant aspects of the formulation in terms of its stability and antimicrobial efficacy against *S. aureus*.

**Supplementary Table 1.** Physicochemical characterization and antimicrobial efficacy of NE-ML 1:5 nanoemulsion formulation.

| Parameter                                                             | Method                                                      | Description                                                                                                                                                                                                        | Reference            |
|-----------------------------------------------------------------------|-------------------------------------------------------------|--------------------------------------------------------------------------------------------------------------------------------------------------------------------------------------------------------------------|----------------------|
| Composition of macela-loaded nanoemulsion (NE-ML)                     | High-pressure homogenization (HPH)                          | Tween 80 (1%, w/v)<br>Flaxseed Oil (5%, w/v)<br>Extractive macela solution (20%, v/v) <sup>a</sup><br>Water (100 q.s. to) (mL)                                                                                     | Machado et al., 2020 |
| Chemical characterization of macela extract                           | High-performance liquid chromatography (HPLC)               | 3-O-methylquercetin ( $187.3 \pm 0.1 \mu\text{g ml}^{-1}$ )<br>ACB ( $155.4 \pm 11.6 \mu\text{g ml}^{-1}$ )<br>Quercetin ( $76.3 \pm 0.1 \mu\text{g ml}^{-1}$ )<br>Luteolin ( $30.4 \pm 0.0 \mu\text{g ml}^{-1}$ ) | Machado et al., 2020 |
| Chemical characterization of flaxseed oil                             | Gas chromatography coupled to mass spectrometry (GC/MS)     | Linoleic (LOA) ( $30.5\% \pm 0.1$ )<br>Alpha-linolenic ( $30.7\% \pm 0.1$ )<br>Oleic ( $25.7\% \pm 0.1$ )<br>Palmitic acid (7.2%)<br>Stearic acid (4.2%)                                                           | Machado et al., 2020 |
| Encapsulation efficiency of macela compounds in nanoemulsions         | Ultrafiltration and centrifugation technique                | > 94%                                                                                                                                                                                                              | Machado et al., 2020 |
| Visual analysis of NE-ML                                              | Visual description                                          | Homogeneous formulation without precipitation or phase separation and yellowish milky appearance                                                                                                                   | Machado et al., 2020 |
| Stability studies over time - storage at room temperature (Day 0)     | Dynamic light scattering (DLS) and Laser Doppler Anemometry | Mean particle size (nm) $249.9 \pm 2.6$<br>Polydispersity index (PdI) $0.17 \pm 0.0$<br>Zeta potential ZP (mV) $-39.9 \pm 2.7$<br>pH $5.1 \pm 0.0$                                                                 | Machado et al., 2020 |
| Stability studies over time - storage at room temperature (Day 160)   | Dynamic light scattering (DLS) and Laser Doppler Anemometry | Mean particle size (nm) $240.2 \pm 0.4$<br>Polydispersity index (PdI) $0.18 \pm 0.0$<br>Zeta potential ZP (mV) $-38.2 \pm 1.5$<br>pH $4.6 \pm 0.0$                                                                 | Machado et al., 2020 |
| Analysis of the accelerated physical stability of the nanoformulation | Dispersion analyzer                                         | Instability index between 0.2–0.6                                                                                                                                                                                  | Machado et al., 2020 |

| Antimicrobial activity (Planktonic bacteria)                                                  | Broth microdilution method                                                | MIC <sub>50</sub> 1.2% (v/v)<br>MIC <sub>90</sub> 5% (v/v)                                                                                                                                                                                                                     | Machado et al., 2020          |
|-----------------------------------------------------------------------------------------------|---------------------------------------------------------------------------|--------------------------------------------------------------------------------------------------------------------------------------------------------------------------------------------------------------------------------------------------------------------------------|-------------------------------|
| Evaluation of biofilm prevention                                                              | 96-well microplate                                                        | NE-ML1:5 prevented 100% of biofilm formation at concentrations of 10% and 25% (v/v) for 2 MRSA strains from mastitic bovine milk. At 25% (v/v) it reduced biofilm mass by over 64% for ATCC 25923 and 2 MRSA strains.                                                          | Machado et al., 2020          |
| Permeation and retention of free and nano-encapsulated chemical markers of the macela extract | Franz diffusion cells                                                     | The final permeation of quercetin and 3-O-methylquercetin in NE-ML was $50.7 \pm 3.2$ and $111.2 \pm 0.6 \mu\text{g}/\text{cm}^2$ , respectively, compared to the final permeation of free extract of $35.0 \pm 0.6$ and $48.9 \pm 1.2 \mu\text{g}/\text{cm}^2$ , respectively | Pinheiro Machado et al., 2022 |
| Cell viability of mammary epithelial cells (MAC-T)                                            | MTT method (3-(4,5-dimethylthiazol-2-yl)-2,5-diphenyltetrazolium bromide) | After exposure to NE-ML (5 and 1.2% v/v), the percentage of apoptotic cells was reduced by $\pm 30\%$                                                                                                                                                                          | Pinheiro Machado et al., 2022 |
| Necrotic or apoptotic cell death                                                              | Flow cytometry and exposure to H <sub>2</sub> O <sub>2</sub> (2 mM)       | In the H <sub>2</sub> O <sub>2</sub> assay, the percentage of cells in necrosis was reduced by 40% after exposure to NE-ML at 1% (v/v) + 2 mM H <sub>2</sub> O <sub>2</sub>                                                                                                    | Pinheiro Machado et al., 2022 |

<sup>a</sup> In the final composition of the macela nanoemulsions (NE-ML), the extract content corresponded to  $2.5 \text{ mg mL}^{-1}$ .

Visually, the formulation was homogeneous, with no precipitation or phase separation, and presented a milky yellow appearance, as shown in Supplementary Figure 1. This figure illustrates the different treatments applied during the development of the nanoformulation, with the NE-ML 1:5 treatment being the one selected for this manuscript due to its superior performance.

**Supplementary Figure 1.** The physical appearance of the nanoemulsion loaded with macela (20%, v/v equivalent to  $2.5 \text{ mg mL}^{-1}$  of extract; NE-ML) and droplet size distribution of NE-ML1:5.

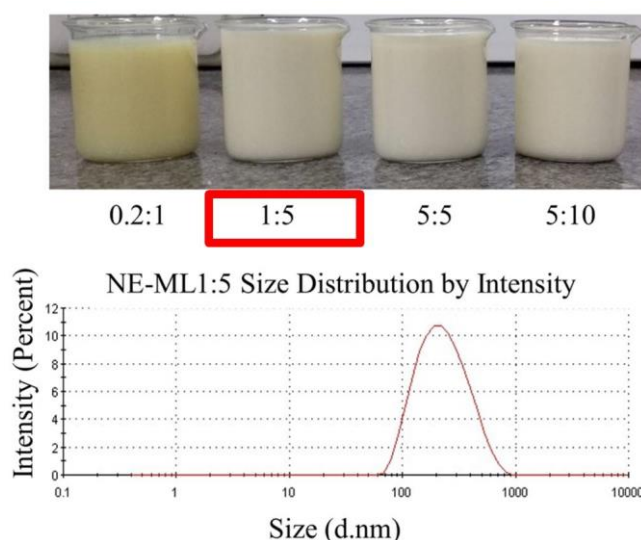

Adapted from Machado et al. (2020), license [CC BY 4.0](https://creativecommons.org/licenses/by/4.0/)

In addition to the visual inspection, the morphological characterization of the macela nanoemulsion was performed using transmission electron microscopy (TEM) (JEOL JEM 1011 TEM), which

allowed a detailed observation of the particle structure. Supplementary Figure 2 shows the TEM micrographs of the different formulations tested, including the NE-ML 1:5 treatment, which was selected for this study. The micrographs showed that the particles in the selected formulation were spherical, which is a key feature contributing to its physicochemical stability and antimicrobial efficacy. This structural analysis supports the findings summarized in Table 1 and reinforces the selection of the NE-ML 1:5 formulation for further investigation in this manuscript.

**Supplementary Figure 2.** Transmission electron micrographs of the nanoemulsion loaded with macela (NE-ML 1:5).

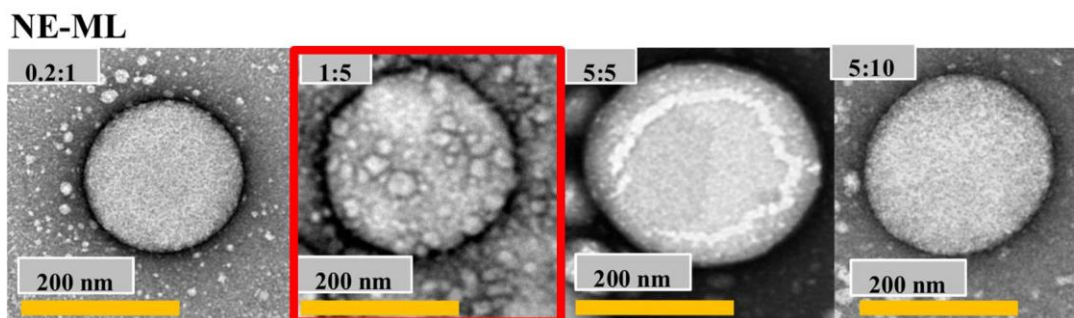

Adapted from Machado et al. (2020), license [CC BY 4.0](#)

## References

Machado, G.T.P., Veleirinho, M.B., Honorato, L.A., and Kuhnen, S. (2020). Formulation and evaluation of anti-MRSA nanoemulsion loaded with *Achyrocline satureioides*: a new sustainable strategy for the bovine mastitis. *Nano Express* 1 (3), 030004. [doi.org/10.1088/2632-959X/abbcac](https://doi.org/10.1088/2632-959X/abbcac). License [CC BY 4.0](#)

Pinheiro Machado, G.T., Veleirinho, M.B., Ferreira, R.G., Zuglianello, C., Lemos-Senna, E., and Kuhnen, S. (2022). Protection of bovine mammary epithelial cells by a nanoemulsion of the medicinal herb *Achyrocline satureioides* (Lam.) DC and its capacity of permeation through the mammary epithelium. *Journal of Dairy Research* 89 (1), 80–85. [doi.org/10.1017/S0022029922000139](https://doi.org/10.1017/S0022029922000139)
